# Supplementary material
Source: PubMed Central journal article supplement (PMC6438627)
Supplement: NIHMS1019585-supplement-SI.pdf [file NIHMS1019585-supplement-SI.pdf]

# **Biomolecular Solvation Structure Revealed by Molecular Dynamics Simulations**

Michael E. Wall<sup>1\*</sup>, Gaetano Calabró<sup>2,3</sup>, Christopher I. Bayly<sup>2</sup>, David L. Mobley<sup>3,4</sup>, and Gregory L. Warren<sup>2</sup>

<sup>1</sup>Computer Computational, and Statistical Sciences Division, Los Alamos National Laboratory, Mail Stop B256, Los Alamos, NM 87545 USA

<sup>2</sup>OpenEye Scientific Software, 9 Bisbee Court, Unit D, Santa Fe, NM 87507

<sup>3</sup>Department of Pharmaceutical Sciences, University of California, Irvine, 3134B Natural Sciences 1, Irvine, CA 92697 USA

<sup>4</sup>Department of Chemistry, University of California, Irvine, 3134B Natural Sciences 1, Irvine, CA 92697

Los Alamos National Laboratory LA-UR-18-31234

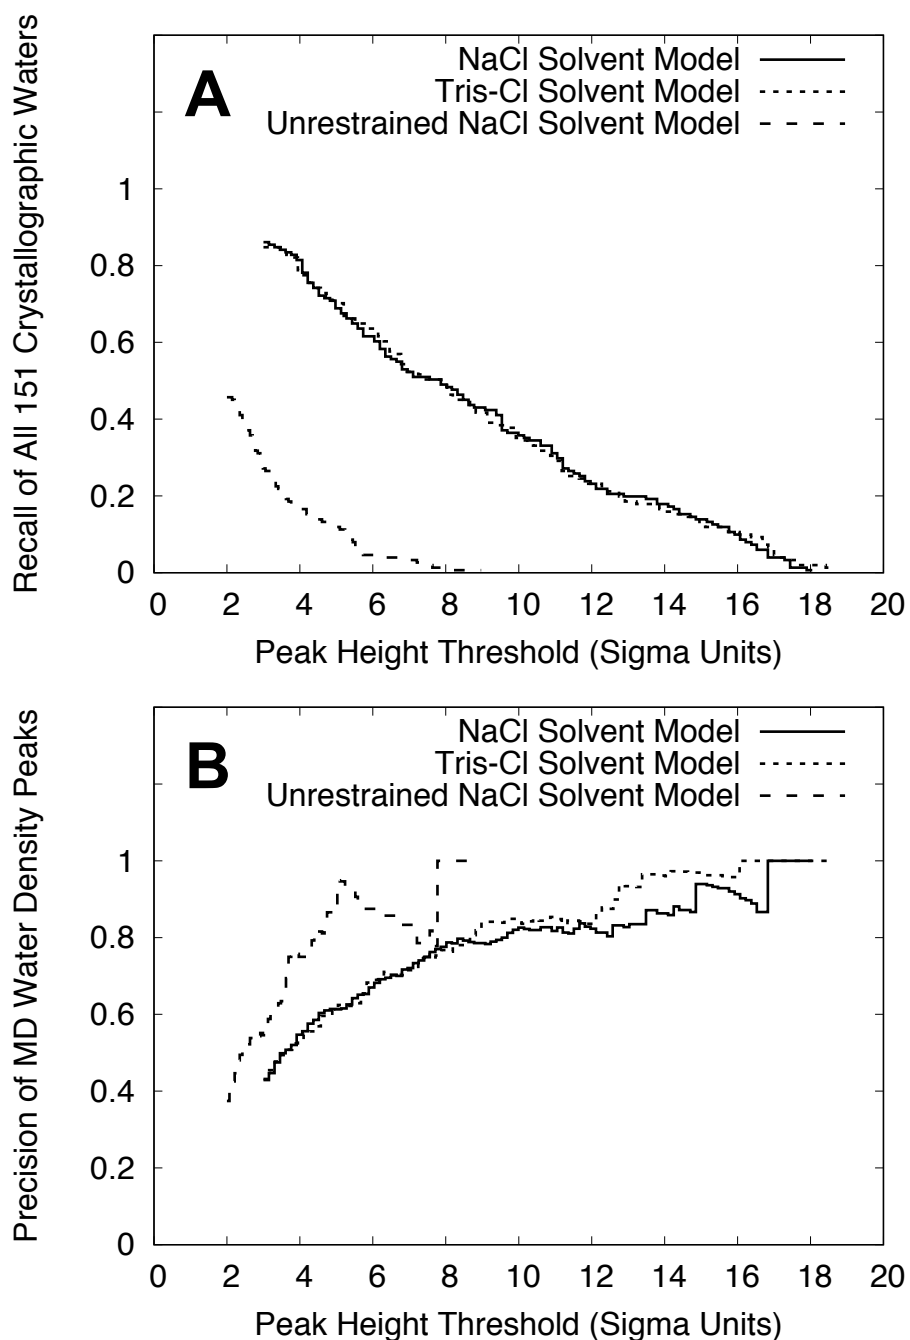

Supporting Figure S1. Dependence of recall and precision on MD water density peak height threshold. (A) Recall. (B) Precision. Statistics were computed using all 151 crystallographic waters, using a cutoff distance of 1.0 Å. Results for the restrained NaCl and Tris-Cl models were obtained using the last 10 ns of the trajectories. Results for the unrestrained NaCl model were obtained using the first 100 ns of the trajectory.
